# Supplementary material for: ER intrabody-mediated inhibition of interferon α secretion by mouse macrophages and dendritic cells
Source: PubMed Central journal article supplement (PMC6467385; doi:10.1371/journal.pone.0215062), 2019-04-16
Supplement: pone.0215062.s001.pdf [file pone.0215062.s001.pdf]

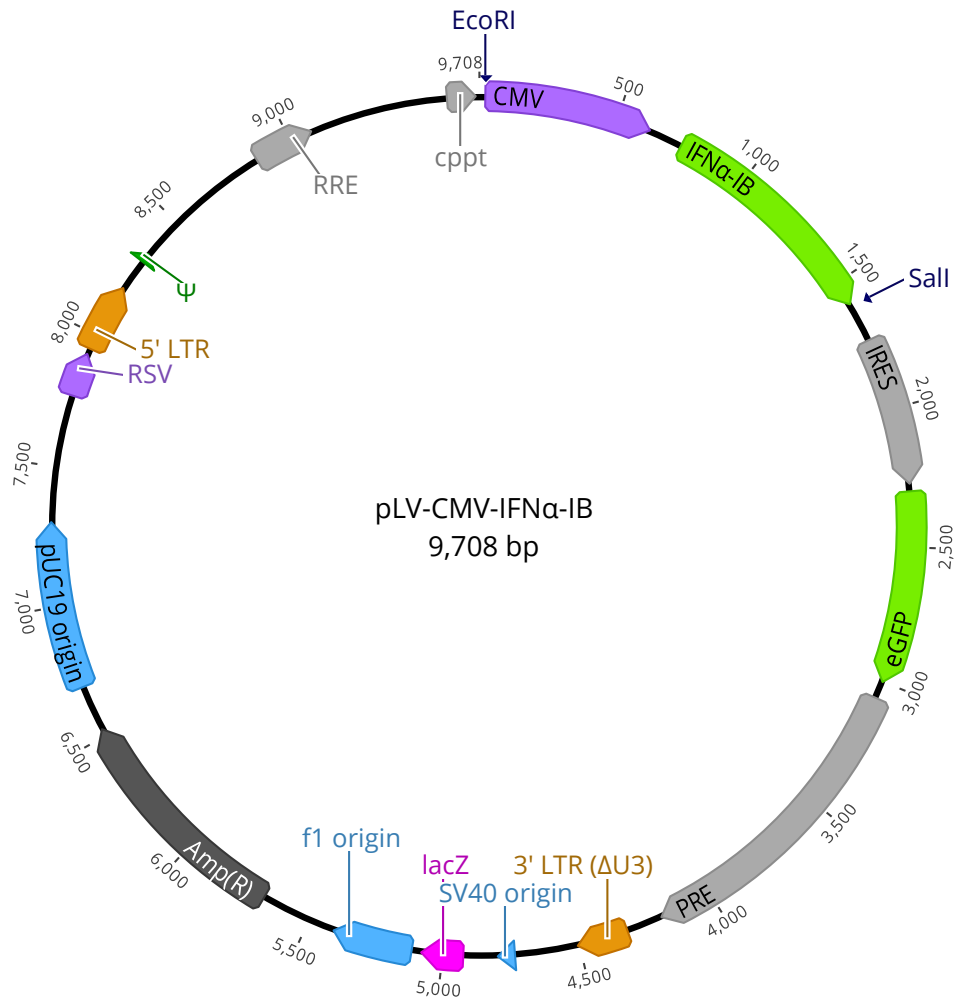

**S1 Fig. Third generation lentiviral transfer vector for IFN $\alpha$ -IB co-expressed with eGFP.**

HIV: Human immunodeficiency virus 1, RSV: Murine Rous sarcoma virus enhancer/promoter, 5' LTR: 5' long terminal repeat,  $\Psi$ : HIV Psi packaging element, RRE: HIV rev response element, cppt: HIV central polypurine tract, IRES: EMCV internal ribosomal entry site, PRE: Hepatitis B virus posttranscriptional regulatory element, CMV: CMV promoter, IFN  $\alpha$ -IB: anti-mouse IFN $\alpha$  intrabody, 3'-LTR: HIV 3' self inactivating ( $\Delta$ U3) long terminal repeat.
