# Supplementary material for: ER intrabody-mediated inhibition of interferon α secretion by mouse macrophages and dendritic cells
Source: PubMed Central journal article supplement (PMC6467385; doi:10.1371/journal.pone.0215062), 2019-04-16
Supplement: pone.0215062.s002.pdf [file pone.0215062.s002.pdf]

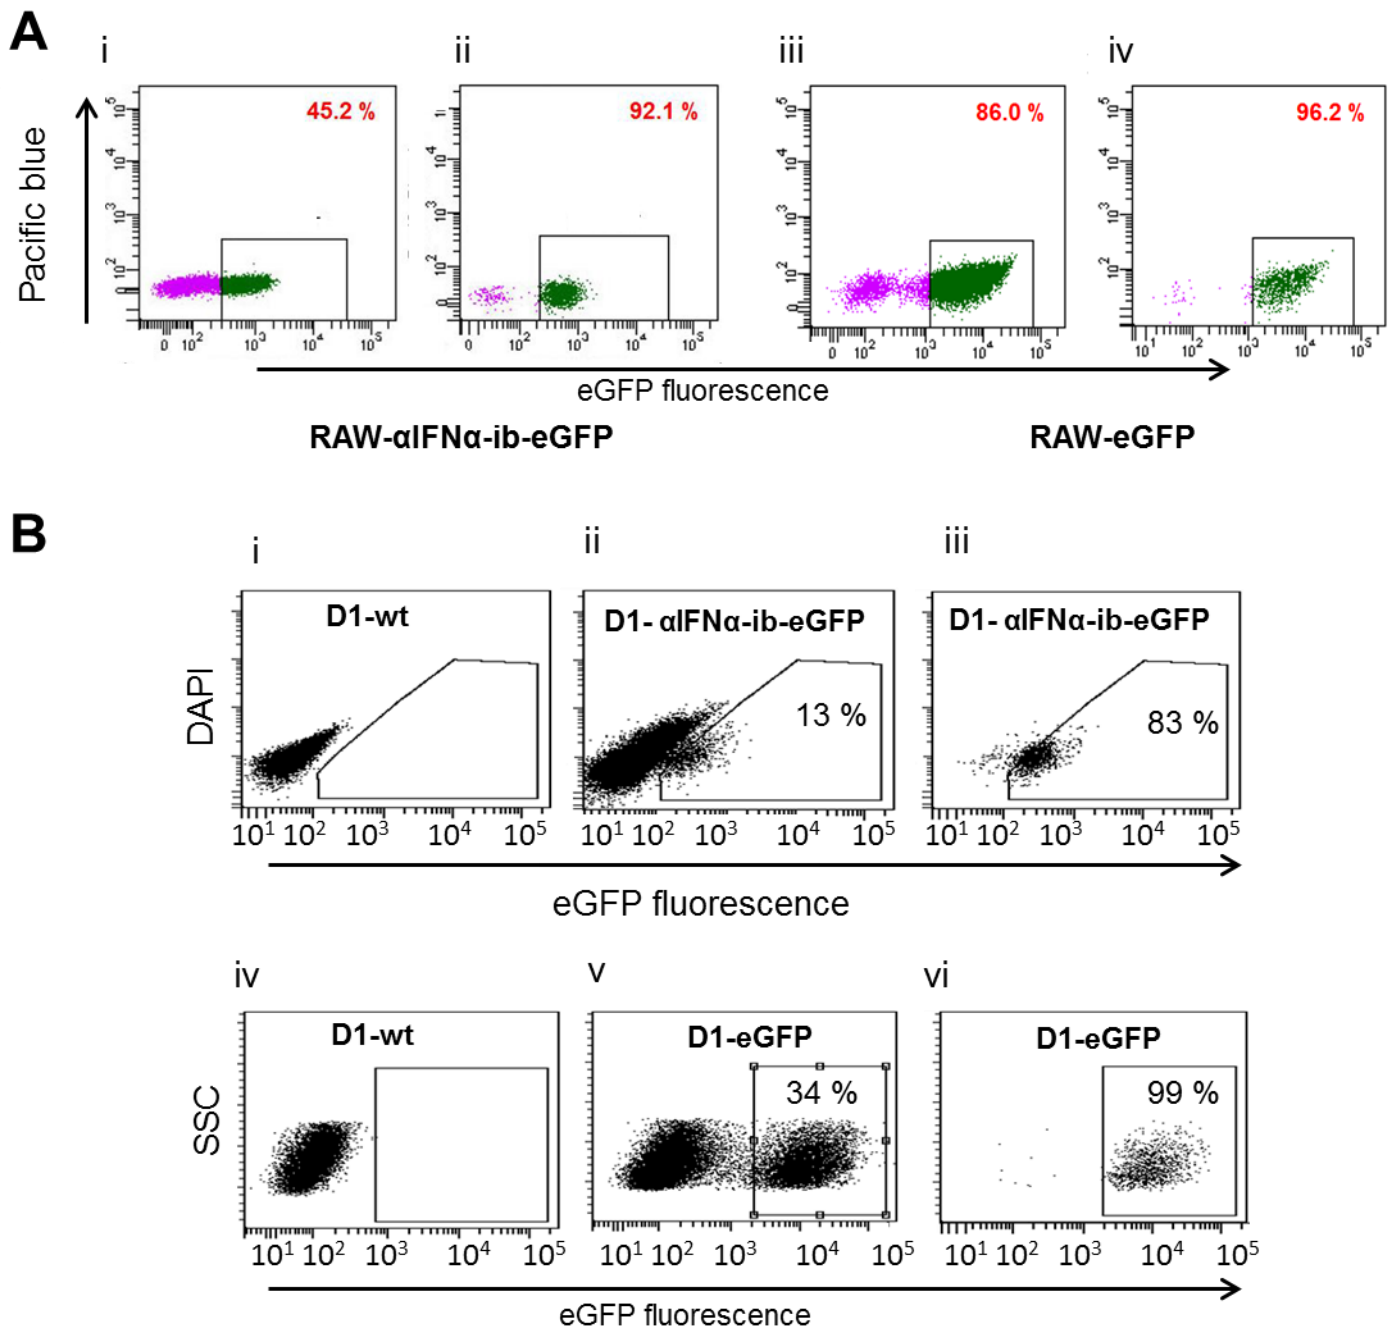

**S2 Fig. Analysis of lentivirally transduced RAW 264.7 macrophages and dendritic D1 cells before and after sorting by flow cytometry**

A, Upon transduction of RAW 264.7 cells with recombinant lentiviruses generated with transfer vectors pLVCMV- $\alpha$ IFN $\alpha$ -ib or pHR'SIN-SEW, cells were sorted for isolating  $\alpha$ IFN $\alpha$ -ib and eGFP-expressing cells (RAW- $\alpha$ IFN $\alpha$ -ib-eGFP; i, ii) or only eGFP-expressing control cells (RAW-eGFP; iii, iv). i and iii show eGFP fluorescence of cells before sorting and ii and iv after three rounds of sorting. Non-transduced RAW 264.7 cells were used as reference. Dead cells were identified by staining with Pacific blue. Shown are living, gated cells. Green and pink dots represent eGFP-positive and negative cells, respectively. B, i-vi, Upon transduction of D1 cells with recombinant lentiviruses generated with transfer vectors pLV5FFV- $\alpha$ IFN $\alpha$ -ib or pHR'SIN-SEW, cells were sorted twice to generate stable eGFP (D1-eGFP) or  $\alpha$ IFN $\alpha$ -ib and eGFP (D1- $\alpha$ IFN $\alpha$ -ib-eGFP) expressing cells. Shown are eGFP fluorescence of D1- $\alpha$ IFN $\alpha$ -ib-eGFP cells before (ii) and after sorting (iii). Panel v depicts eGFP fluorescence of D1-eGFP cells before sorting and vi after sorting. Non-transduced D1 wild type cells (D1-wt) are shown as reference (i, iv). eGFP fluorescence of gated living cells is shown. D1- $\alpha$ IFN $\alpha$ -ib-eGFP cells were stained with DAPI to clearly distinguish the eGFP-positive cells from non-transduced cells (ii, iii).
